# Supplementary material for: Estimating the Minimal Number of Repeated Examinations for Random Responsiveness With the Coma Recovery Scale—Revised as an Example
Source: Front Integr Neurosci. 2021 Jul 8;15:685627. doi: 10.3389/fnint.2021.685627 (PMC8297543; doi:10.3389/fnint.2021.685627)
Supplement: Supplementary file 1 [file Data_Sheet_1.docx]

**Supplementary Material A：**

**Table A The characteristic data of 100 disorders of consciousness patients**

| Patients | Sex | Age（years） | Cause | TSI months | CRS-R (best) | CRS-R total score | Diagnosis | Number of examinations |
| --- | --- | --- | --- | --- | --- | --- | --- | --- |
| 1 | M | 74 | TBI | 8 | 2-3-5-1-0-2 | 13 | MCS- | 1 |
| 2 | F | 65 | TBI | 3.7 | 0-0-5-1-0-2 | 8 | MCS- | 1 |
| 3 | F | 71 | TBI | 10 | 2-2-5-2-0-2 | 13 | MCS- | 1 |
| 4 | M | 32 | TBI | 4.9 | 2-3-2-1-0-2 | 10 | MCS- | 1 |
| 5 | M | 64 | TBI | 3.2 | 2-2-5-2-0-2 | 13 | MCS- | 1 |
| 6 | M | 37 | TBI | 9.8 | 1-3-2-1-0-1 | 8 | MCS- | 1 |
| 7 | M | 73 | TBI | 1.4 | 0-0-5-0-0-2 | 7 | MCS- | 1 |
| 8 | F | 47 | TBI | 5.3 | 1-1-5-1-0-1 | 9 | MCS- | 1 |
| 9 | M | 67 | TBI | 10.2 | 1-3-5-2-0-2 | 13 | MCS- | 1 |
| 10 | M | 71 | TBI | 1.1 | 0-1-5-1-0-1 | 8 | MCS- | 1 |
| 11 | F | 61 | TBI | 2.3 | 2-4-5-2-0-2 | 15 | MCS- | 1 |
| 12 | M | 73 | TBI | 1.2 | 0-1-5-1-0-1 | 8 | MCS- | 1 |
| 13 | M | 59 | TBI | 14 | 1-4-2-1-0-1 | 9 | MCS- | 1 |
| 14 | M | 65 | TBI | 7 | 1-3-2-1-0-1 | 8 | MCS- | 1 |
| 15 | F | 18 | TBI | 5 | 1-3-3-1-0-2 | 10 | MCS- | 1 |
| 16 | M | 71 | TBI | 5.5 | 0-1-3-1-0-2 | 7 | MCS- | 1 |
| 17 | M | 59 | TBI | 2 | 0-1-3-0-0-1 | 5 | MCS- | 1 |
| 18 | M | 66 | TBI | 1.5 | 1-1-3-0-0-1 | 6 | MCS- | 1 |
| 19 | M | 52 | TBI | 1.5 | 0-1-5-0-0-2 | 8 | MCS- | 1 |
| 20 | M | 43 | TBI | 12 | 0-0-3-1-0-0 | 4 | MCS- | 1 |
| 21 | M | 46 | TBI | 24 | 1-2-5-1-0-2 | 11 | MCS- | 1 |
| 22 | M | 51 | TBI | 5.1 | 0-0-5-0-0-1 | 6 | MCS- | 1 |
| 23 | M | 56 | TBI | 9.4 | 1-3-5-1-0-1 | 11 | MCS- | 1 |
| 24 | M | 54 | TBI | 6 | 0-1-5-1-0-2 | 9 | MCS- | 1 |
| 25 | M | 38 | TBI | 3.3 | 2-3-5-2-0-2 | 14 | MCS- | 1 |
| 26 | M | 38 | TBI | 2.3 | 3-4-5-1-0-1 | 14 | MCS+ | 1 |
| 27 | M | 58 | TBI | 6 | 2-3-5-3-1-1 | 15 | MCS+ | 1 |
| 28 | M | 56 | TBI | 2.5 | 3-4-5-1-0-2 | 15 | MCS+ | 1 |
| Patients | Sex | Age（years） | Cause | TSI months | CRS-R (best) | CRS-R total score | Diagnosis | Number of examinations |
| 29 | M | 68 | TBI | 1.5 | 2-4-5-3-0-1 | 15 | MCS+ | 1 |
| 30 | M | 62 | TBI | 1 | 2-4-5-3-1-3 | 18 | MCS+ | 1 |
| 31 | M | 77 | TBI | 9.2 | 0-4-5-1-0-1 | 11 | MCS- | 2 |
| 32 | M | 45 | TBI | 11.2 | 0-0-5-1-0-1 | 7 | MCS- | 2 |
| 33 | M | 68 | TBI | 7.5 | 1-3-2-1-0-1 | 8 | MCS- | 2 |
| 34 | M | 58 | TBI | 5.5 | 0-3-2-1-0-2 | 8 | MCS- | 3 |
| 35 | M | 44 | TBI | 1.5 | 1-2-2-1-0-2 | 8 | MCS- | 3 |
| 36 | F | 48 | TBI | 1.5 | 2-3-1-0-0-2 | 8 | MCS- | 3 |
| 37 | M | 73 | TBI | 4.1 | 1-1-4-1-0-1 | 8 | MCS- | 4 |
| 38 | F | 75 | TBI | 8 | 1-3-2-0-0-2 | 8 | MCS- | 4 |
| 39 | F | 64 | TBI | 12.5 | 0-1-2-1-0-2 | 6 | UWS | 13 |
| 40 | F | 69 | TBI | 9 | 1-1-2-1-0-2 | 7 | UWS | 13 |
| 41 | M | 59 | TBI | 1.9 | 1-1-2-1-0-2 | 7 | UWS | 13 |
| 42 | F | 62 | TBI | 8.2 | 0-0-2-1-0-2 | 5 | UWS | 13 |
| 43 | M | 48 | TBI | 6.3 | 1-1-2-1-0-2 | 7 | UWS | 13 |
| 44 | M | 38 | TBI | 3.2 | 1-1-2-1-0-1 | 6 | UWS | 13 |
| 45 | M | 71 | TBI | 3 | 1-1-2-1-0-2 | 7 | UWS | 13 |
| 46 | M | 51 | TBI | 2 | 1-1-2-1-0-1 | 6 | UWS | 13 |
| 47 | M | 57 | TBI | 2 | 0-1-2-1-0-1 | 5 | UWS | 13 |
| 48 | M | 69 | TBI | 6 | 0-1-2-0-0-2 | 5 | UWS | 13 |
| 49 | M | 70 | TBI | 9.5 | 1-0-2-2-0-2 | 7 | UWS | 13 |
| 50 | M | 56 | TBI | 2.4 | 1-0-2-1-0-2 | 6 | UWS | 13 |
| 51 | F | 48 | NTBI | 5 | 0-3-5-2-0-2 | 12 | MCS- | 1 |
| 52 | M | 44 | NTBI | 17.5 | 0-3-2-1-0-2 | 8 | MCS- | 1 |
| 53 | M | 83 | NTBI | 1 | 0-4-4-1-0-2 | 11 | MCS- | 1 |
| 54 | F | 71 | NTBI | 1.5 | 1-3-2-1-0-2 | 9 | MCS- | 1 |
| 55 | F | 58 | NTBI | 5 | 1-3-2-1-0-1 | 8 | MCS- | 1 |
| 56 | M | 58 | NTBI | 10 | 0-4-5-2-0-2 | 13 | MCS- | 1 |
| 57 | M | 43 | NTBI | 1.5 | 0-0-3-1-0-1 | 5 | MCS- | 1 |
| 58 | M | 69 | NTBI | 3.5 | 0-0-3-1-0-0 | 4 | MCS- | 1 |
| Patients | Sex | Age（years） | Cause | TSI months | CRS-R (best) | CRS-R total score | Diagnosis | Number of examinations |
| 59 | M | 62 | NTBI | 1 | 1-3-3-1-0-0 | 8 | MCS- | 1 |
| 60 | M | 55 | NTBI | 4.5 | 1-1-3-1-0-2 | 8 | MCS- | 1 |
| 61 | M | 42 | NTBI | 3.2 | 0-3-2-0-0-1 | 6 | MCS- | 1 |
| 62 | F | 53 | NTBI | 27.8 | 1-2-3-1-0-2 | 9 | MCS- | 1 |
| 63 | M | 68 | NTBI | 8.7 | 2-3-5-0-0-2 | 12 | MCS- | 1 |
| 64 | M | 38 | NTBI | 2 | 3-5-5-2-1-2 | 18 | MCS+ | 1 |
| 65 | M | 41 | NTBI | 2.5 | 4-5-5-3-1-3 | 21 | MCS+ | 1 |
| 66 | M | 70 | NTBI | 12.7 | 3-4-5-1-0-2 | 15 | MCS+ | 1 |
| 67 | F | 68 | NTBI | 1.1 | 3-1-3-2-1-2 | 12 | MCS+ | 1 |
| 68 | F | 66 | NTBI | 5 | 3-4-4-0-0-2 | 13 | MCS+ | 1 |
| 69 | F | 65 | NTBI | 2.6 | 1-3-2-1-0-1 | 8 | MCS- | 1 |
| 70 | M | 71 | NTBI | 1.5 | 2-3-2-1-0-1 | 9 | MCS- | 1 |
| 71 | M | 82 | NTBI | 1.3 | 0-1-5-0-0-1 | 7 | MCS- | 1 |
| 72 | M | 38 | NTBI | 1 | 2-3-5-0-0-2 | 12 | MCS- | 1 |
| 73 | M | 77 | NTBI | 1 | 2-4-5-2-0-3 | 16 | MCS- | 1 |
| 74 | M | 79 | NTBI | 5.8 | 1-3-2-1-0-2 | 9 | MCS- | 1 |
| 75 | M | 78 | NTBI | 4 | 3-3-0-0-1-2 | 9 | MCS+ | 1 |
| 76 | M | 50 | NTBI | 1.7 | 3-5-5-0-1-3 | 13 | MCS+ | 1 |
| 77 | F | 83 | NTBI | 1 | 3-5-5-0-1-3 | 17 | MCS+ | 1 |
| 78 | F | 70 | NTBI | 3.2 | 3-4-5-2-1-2 | 17 | MCS+ | 1 |
| 79 | F | 49 | NTBI | 2.3 | 2-4-5-1-0-1 | 13 | MCS- | 1 |
| 80 | M | 54 | NTBI | 6.3 | 2-3-2-1-0-1 | 9 | MCS- | 2 |
| 81 | M | 74 | NTBI | 2.6 | 1-4-2-1-0-1 | 9 | MCS- | 2 |
| 82 | M | 63 | NTBI | 4.5 | 1-3-1-0-0-1 | 6 | MCS- | 2 |
| 83 | M | 42 | NTBI | 3 | 0-2-1-0-0-2 | 5 | MCS- | 3 |
| 84 | M | 63 | NTBI | 13.1 | 1-3-1-0-0-2 | 7 | MCS- | 3 |
| 85 | M | 55 | NTBI | 7.3 | 1-3-2-1-0-1 | 8 | MCS- | 4 |
| 86 | M | 63 | NTBI | 4 | 1-0-1-1-0-1 | 4 | UWS | 13 |
| 87 | M | 78 | NTBI | 1.5 | 1-1-2-1-0-2 | 7 | UWS | 13 |
| 88 | F | 67 | NTBI | 1 | 1-1-2-1-0-1 | 6 | UWS | 13 |
| Patients | Sex | Age（years） | Cause | TSI months | CRS-R (best) | CRS-R total score | Diagnosis | Number of examinations |
| 89 | F | 48 | NTBI | 3.5 | 1-1-2-1-0-2 | 7 | UWS | 13 |
| 90 | M | 69 | NTBI | 4 | 1-1-2-1-0-2 | 7 | UWS | 13 |
| 91 | M | 39 | NTBI | 2 | 1-1-2-1-0-2 | 7 | UWS | 13 |
| 92 | F | 56 | NTBI | 2.6 | 0-0-2-1-0-1 | 4 | UWS | 13 |
| 93 | F | 43 | NTBI | 4.7 | 1-0-2-1-0-2 | 6 | UWS | 13 |
| 94 | M | 61 | NTBI | 1.5 | 1-1-2-1-0-1 | 6 | UWS | 13 |
| 95 | M | 78 | NTBI | 5.3 | 0-0-2-1-0-1 | 4 | UWS | 13 |
| 96 | M | 34 | NTBI | 3.9 | 1-1-2-1-0-2 | 7 | UWS | 13 |
| 97 | M | 30 | NTBI | 2.8 | 1-1-2-1-0-2 | 7 | UWS | 13 |
| 98 | F | 26 | NTBI | 2.5 | 1-1-2-1-0-2 | 7 | UWS | 13 |
| 99 | M | 68 | NTBI | 5.5 | 1-0-2-2-0-2 | 7 | UWS | 13 |
| 100 | F | 63 | NTBI | 1 | 1-0-2-1-0-1 | 5 | UWS | 13 |

*TSI: time since injury (months after injury); CRS-R: Coma Recovery Scale-Revised; M: male; F: female; TBI: traumatic brain injury; NTBI: non- traumatic brain injury, UWS*: *unresponsive wakefulness syndrome; MCS-: minimally conscious state minus; MCS+: minimally conscious state plus.*

**Supplementary Material B：**

We developed a general method for estimation of the minimal number of repeated examinations needed to detect patients with random responsiveness given a limited rate of missed diagnosis. To validate this method, a series of stochastic simulations has been carried out using R programming under all possible combinations of 3 types of distributions for (constant, normal and uniform), 5 values of ( = 0.5, 0.6, 0.8, 0.9) and 4 sizes of sample (= 50, 100, 500, 1000), with each scenario repeated for 100 times.

Table B1.1 lists the results of 100 replicates under the scenario of constant =0.7 and sample size 1000. Table B1.2 shows the mean and 95% confidence interval (CI) of the estimates corresponding to different sample sizes and constant =0.7. Table B1.3 lists the detailed results under the scenario of and sample size 1000. Table B1.4 shows the mean and 95% CI of the estimates corresponding to different sample sizes and. Table B1.5 lists the results of 100 replicates under the scenario of, and sample size 1000. Table B1.6 shows the mean and 95% CI of the estimates corresponding to different sample sizes and . Table B1.7 lists the results of 100 replicates under the scenario of , and sample size 1000. Table B1.8 shows the mean and 95% CI of the estimates corresponding to different sample sizes and. Table B1.9 lists the results of 100 replicates under the scenario of and sample size 1000. Table B1.10 shows the mean and 95% CI of the estimates corresponding to different sample sizes and .

Table B2.1 to Table B2.4 list the mean and 95% CI of the estimates corresponding to different conditions of constant *p* (0.5, 0.6, 0.7, 0.8, 0.9) and sample sizes (= 50, 100, 500, 1000).

Table B3.1 to Table B3.4 list the mean and 95% CI of the estimates corresponding to different conditions of .

Table B4.1 to Table B4.5 list the mean and 95% CI of the estimates corresponding to different conditions of .

Table B5.1 to Table B5.4 list the mean and 95% CI of the estimates corresponding to different conditions of .

Table B6.1 to Table B6.4 list the mean and 95% CI of the estimates corresponding to different conditions of .

Table B7.1 to Table B7.5 lists the mean and 95% CI of the estimates for 5 different conditions of uniform distributed .

Table B8.1 to Table B8.4 lists the mean and 95% CI of the estimates for 4 different conditions of uniform distributed .

**Table B1.1 Summary for , *n* =1000**

| **ID** |  |  |  |  |  |  |  |  |  | ***** | **#** |  |  |
| --- | --- | --- | --- | --- | --- | --- | --- | --- | --- | --- | --- | --- | --- |
| **1** | 699 | 205 | 73 | 13 | 6 | 3 | 1 | 0 | - | 1000 | 0.70 | 8 | 0 |
| **2** | 719 | 192 | 61 | 19 | 7 | 2 | 0 | 0 | - | 1000 | 0.72 | 8 | 0 |
| **3** | 709 | 208 | 64 | 15 | 2 | 1 | 0 | 0 | - | 999 | 0.71 | 8 | 1 |
| **4** | 715 | 194 | 71 | 15 | 3 | 2 | 0 | 0 | - | 1000 | 0.72 | 8 | 0 |
| **…** | … | … | … | … | … | … | … | … | … | … | … | … | … |
| **25** | 708 | 186 | 72 | 22 | 11 | 1 | 0 | 0 | - | 1000 | 0.71 | 8 | 0 |
| **26** | 699 | 194 | 78 | 18 | 6 | 3 | 0 | 0 | - | 998 | 0.70 | 8 | 2 |
| **27** | 700 | 216 | 58 | 18 | 8 | 0 | 0 | 0 | - | 1000 | 0.70 | 8 | 0 |
| **…** | … | … | … | … | … | … | … | … | … | … | … | … | … |
| **34** | 686 | 217 | 63 | 21 | 7 | 5 | 1 | 0 | - | 1000 | 0.69 | 8 | 0 |
| **35** | 716 | 197 | 61 | 17 | 4 | 1 | 3 | 0 | - | 999 | 0.72 | 8 | 1 |
| **36** | 700 | 211 | 57 | 20 | 7 | 2 | 3 | 0 | - | 1000 | 0.70 | 8 | 0 |
| **…** | … | … | … | … | … | … | … | … | … | … | … | … | … |
| **40** | 720 | 188 | 60 | 19 | 10 | 2 | 1 | 0 | - | 1000 | 0.72 | 8 | 0 |
| **41** | 691 | 218 | 69 | 15 | 5 | 0 | 1 | 0 | - | 999 | 0.69 | 8 | 1 |
| **42** | 670 | 235 | 66 | 23 | 5 | 1 | 0 | 0 | 0 | 1000 | 0.67 | 9 | 0 |
| **…** | … | … | … | … | … | … | … | … | … | … | … | … | … |
| **48** | 705 | 203 | 69 | 17 | 4 | 2 | 0 | 0 | - | 1000 | 0.71 | 8 | 0 |
| **ID** |  |  |  |  |  |  |  |  |  | ***** | **#** |  |  |
| **49** | 701 | 220 | 55 | 21 | 2 | 0 | 0 | 0 | - | 999 | 0.70 | 8 | 1 |
| **50** | 670 | 245 | 57 | 23 | 4 | 1 | 0 | 0 | 0 | 1000 | 0.67 | 9 | 0 |
| **…** | … | … | … | … | … | … | … | … | … | … | … | … | … |
| **58** | 705 | 206 | 61 | 19 | 4 | 2 | 3 | 0 | - | 1000 | 0.71 | 8 | 0 |
| **59** | 707 | 190 | 63 | 28 | 8 | 1 | 1 | 1 | - | 999 | 0.71 | 8 | 1 |
| **60** | 696 | 216 | 66 | 17 | 3 | 1 | 1 | 0 | - | 1000 | 0.70 | 8 | 0 |
| **…** | … | … | … | … | … | … | … | … | … | … | … | … | … |
| **71** | 704 | 204 | 62 | 19 | 8 | 2 | 0 | 1 | - | 1000 | 0.70 | 8 | 0 |
| **72** | 698 | 214 | 60 | 20 | 7 | 0 | 0 | 0 | - | 999 | 0.70 | 8 | 1 |
| **73** | 689 | 220 | 69 | 14 | 8 | 0 | 0 | 0 | - | 1000 | 0.69 | 8 | 0 |
| **…** | … | … | … | … | … | … | … | … | … | … | … | … | … |
| **100** | 701 | 207 | 58 | 26 | 6 | 2 | 0 | 0 | - | 1000 | 0.70 | 8 | 0 |
| **Mean** | 698.96 | 210.14 | 63.86 | 18.97 | 5.78 | 1.51 | 0.51 | 0.18 | 0.07 | 999.92 | 0.70 | 8.14 | 0.08 |

***; #**

**Table B1.2 Summary for , *n* =1000, 500, 100, 5**

|  | | **Mean and 95% Confidence interval** | | | | |
| --- | --- | --- | --- | --- | --- | --- |
|  |  | |  |  |  |  |
| **1000** | 999.92±0.06 | | 0.70±0.003 | 8.14±0.07 | 0.08±0.06 | 0.00008±0.00006 |
| **500** | 499.96±0.04 | | 0.70±0.004 | 8.13±0.10 | 0.04±0.04 | 0.00008±0.00008 |
| **100** | 99.99±0.02 | | 0.71±0.009 | 7.96±0.21 | 0.01±0.02 | 0.00010±0.00020 |
| **50** | 50 | | 0.71±0.011 | 8.11±0.28 | 0 | 0 |

**Table B1.3 Summary for , *n* =1000**

| **ID** |  |  |  |  |  |  |  |  |  | ***** | **#** |  |  |
| --- | --- | --- | --- | --- | --- | --- | --- | --- | --- | --- | --- | --- | --- |
| **1** | 718 | 187 | 71 | 18 | 4 | 2 | 0 | 0 | - | 1000 | 0.72 | 8 | 0 |
| **2** | 704 | 191 | 68 | 24 | 10 | 2 | 0 | 1 | - | 1000 | 0.70 | 8 | 0 |
| **3** | 684 | 205 | 87 | 20 | 3 | 1 | 0 | 0 | 0 | 1000 | 0.68 | 9 | 0 |
| **…** | … | … | … | … | … | … | … | … | … | … | … | … | … |
| **14** | 688 | 209 | 71 | 24 | 7 | 1 | 0 | 0 | - | 1000 | 0.69 | 8 | 0 |
| **15** | 697 | 219 | 53 | 19 | 5 | 5 | 1 | 0 | - | 999 | 0.70 | 8 | 1 |
| **16** | 681 | 223 | 67 | 20 | 6 | 1 | 0 | 0 | 2 | 1000 | 0.68 | 9 | 0 |
| **…** | … | … | … | … | … | … | … | … | … | … | … | … | … |
| **27** | 720 | 197 | 55 | 17 | 9 | 2 | 0 | 0 | - | 1000 | 0.72 | 8 | 0 |
| **28** | 708 | 196 | 62 | 21 | 6 | 5 | 1 | 0 | - | 999 | 0.71 | 8 | 1 |
| **29** | 703 | 206 | 62 | 17 | 7 | 5 | 0 | 0 | - | 1000 | 0.70 | 8 | 0 |
| **30** | 704 | 210 | 61 | 18 | 4 | 1 | 2 | 0 | - | 1000 | 0.70 | 8 | 0 |
| **31** | 684 | 223 | 69 | 19 | 3 | 1 | 0 | 0 | 0 | 999 | 0.68 | 9 | 1 |
| **32** | 707 | 214 | 54 | 17 | 6 | 2 | 0 | 0 | - | 1000 | 0.71 | 8 | 0 |
| **33** | 697 | 213 | 60 | 17 | 9 | 4 | 0 | 0 | - | 1000 | 0.70 | 8 | 0 |
| **34** | 678 | 217 | 69 | 25 | 7 | 3 | 0 | 0 | 0 | 999 | 0.68 | 9 | 1 |
| **…** | … | … | … | … | … | … | … | … | … | … | … | … | … |
| **49** | 693 | 207 | 75 | 20 | 4 | 1 | 0 | 0 | - | 1000 | 0.69 | 8 | 0 |
| **ID** |  |  |  |  |  |  |  |  |  | ***** | **#** |  |  |
| **50** | 703 | 209 | 65 | 14 | 3 | 4 | 0 | 0 | - | 998 | 0.70 | 8 | 2 |
| **51** | 711 | 198 | 65 | 23 | 1 | 0 | 2 | 0 | - | 1000 | 0.71 | 8 | 0 |
| **…** | … | … | … | … | … | … | … | … | … | … | … | … | … |
| **90** | 670 | 245 | 55 | 19 | 8 | 1 | 2 | 0 | 0 | 1000 | 0.67 | 9 | 0 |
| **91** | 694 | 220 | 54 | 21 | 7 | 2 | 0 | 1 | - | 999 | 0.69 | 8 | 1 |
| **92** | 712 | 210 | 47 | 24 | 6 | 1 | 0 | 0 | - | 1000 | 0.71 | 8 | 0 |
| **93** | 702 | 190 | 77 | 21 | 4 | 3 | 2 | 0 | - | 999 | 0.70 | 8 | 1 |
| **94** | 688 | 224 | 60 | 23 | 4 | 1 | 0 | 0 | - | 1000 | 0.69 | 8 | 0 |
| **…** | … | … | … | … | … | … | … | … | … | … | … | … | … |
| **100** | 688 | 211 | 71 | 19 | 9 | 1 | 0 | 1 | **-** | 1000 | 0.69 | 8 | 0 |
| **Mean** | 700.12 | 208.32 | 63.88 | 19.21 | 5.94 | 1.85 | 0.43 | 0.13 | 0.36 | 999.92 | 0.70 | 8.08 | 0.08 |

***; #**

| **Table B1.4 Summary for , *n* =1000, 500, 100, 50** | | | | | |
| --- | --- | --- | --- | --- | --- |
|  | **Mean and 95% Confidence interval** | | | | |
|  |  |  |  |  |  |
| **1000** | 999.92±0.06 | 0.70±0.003 | 8.08±0.07 | 0.08±0.06 | 0.00008±0.00006 |
| **500** | 499.98±0.03 | 0.70±0.004 | 8.10±0.10 | 0.02±0.03 | 0.00004±0.00006 |
| **100** | 99.98±0.03 | 0.70±0.009 | 8.13±0.22 | 0.02±0.03 | 0.00020±0.00028 |
| **50** | 50 | 0.70±0.013 | 8.28±0.31 | 0 | 0 |

**Table B1.5 Summary for , *n* =1000**

| **ID** |  |  |  |  |  |  |  |  |  | ***** | **#** |  |  |
| --- | --- | --- | --- | --- | --- | --- | --- | --- | --- | --- | --- | --- | --- |
| **1** | 711 | 189 | 74 | 19 | 3 | 3 | 1 | 0 | - | 1000 | 0.711 | 8 | 0 |
| **2** | 698 | 190 | 75 | 24 | 8 | 3 | 0 | 2 | - | 1000 | 0.698 | 8 | 0 |
| **3** | 686 | 214 | 79 | 17 | 4 | 0 | 0 | 0 | - | 1000 | 0.686 | 8 | 0 |
| **…** | … | … | … | … | … | … | … | … | … | … | … | … | … |
| **24** | 716 | 205 | 57 | 14 | 5 | 3 | 0 | 0 | - | 1000 | 0.716 | 8 | 0 |
| **25** | 690 | 219 | 69 | 15 | 4 | 1 | 0 | 1 | - | 999 | 0.691 | 8 | 1 |
| **26** | 712 | 185 | 76 | 19 | 5 | 2 | 1 | 0 | - | 1000 | 0.712 | 8 | 0 |
| **27** | 725 | 190 | 55 | 19 | 7 | 3 | 0 | 0 | - | 999 | 0.726 | 8 | 1 |
| **28** | 706 | 198 | 63 | 23 | 9 | 1 | 0 | 0 | - | 1000 | 0.706 | 8 | 0 |
| **…** | … | … | … | … | … | … | … | … | … | … | … | … | … |
| **37** | 691 | 214 | 63 | 22 | 8 | 0 | 2 | 0 | - | 1000 | 0.691 | 8 | 0 |
| **38** | 685 | 205 | 82 | 21 | 5 | 1 | 0 | 0 | - | 999 | 0.686 | 8 | 1 |
| **39** | 693 | 211 | 65 | 22 | 4 | 4 | 1 | 0 | - | 1000 | 0.693 | 8 | 0 |
| **40** | 684 | 222 | 65 | 23 | 5 | 1 | 0 | 0 | 0 | 1000 | 0.684 | 9 | 0 |
| **41** | 720 | 186 | 67 | 16 | 7 | 2 | 0 | 1 | - | 999 | 0.721 | 8 | 1 |
| **42** | 700 | 208 | 63 | 18 | 6 | 2 | 1 | 1 | - | 999 | 0.701 | 8 | 1 |
| **43** | 693 | 214 | 72 | 13 | 4 | 3 | 1 | 0 | - | 1000 | 0.693 | 8 | 0 |
| **…** | … | … | … | … | … | … | … | … | … | … | … | … | … |
| **ID** |  |  |  |  |  |  |  |  |  | ***** | **#** |  |  |
| **52** | 711 | 201 | 61 | 19 | 5 | 2 | 1 | 0 | - | 1000 | 0.711 | 8 | 0 |
| **53** | 723 | 180 | 63 | 26 | 4 | 1 | 1 | 1 | - | 999 | 0.724 | 8 | 1 |
| **54** | 703 | 209 | 62 | 21 | 4 | 1 | 0 | 0 | - | 1000 | 0.703 | 8 | 0 |
| **55** | 692 | 220 | 57 | 24 | 3 | 2 | 1 | 1 | - | 1000 | 0.692 | 8 | 0 |
| **56** | 687 | 218 | 67 | 17 | 5 | 5 | 0 | 0 | - | 999 | 0.688 | 8 | 1 |
| **57** | 697 | 211 | 69 | 18 | 3 | 2 | 0 | 0 | - | 1000 | 0.697 | 8 | 0 |
| **58** | 710 | 227 | 43 | 10 | 7 | 2 | 0 | 0 | - | 999 | 0.711 | 8 | 1 |
| **59** | 708 | 209 | 53 | 18 | 7 | 2 | 1 | 2 | - | 1000 | 0.708 | 8 | 0 |
| **…** | … | … | … | … | … | … | … | … | … | … | … | … | … |
| **66** | 726 | 189 | 60 | 21 | 3 | 1 | 0 | 0 | - | 1000 | 0.726 | 8 | 0 |
| **67** | 705 | 199 | 65 | 23 | 5 | 2 | 0 | 0 | - | 999 | 0.706 | 8 | 1 |
| **68** | 700 | 221 | 52 | 19 | 7 | 1 | 0 | 0 | - | 1000 | 0.700 | 8 | 0 |
| **…** | … | … | … | … | … | … | … | … | … | … | … | … | … |
| **70** | 716 | 200 | 59 | 16 | 5 | 4 | 0 | 0 | - | 1000 | 0.716 | 8 | 0 |
| **71** | 711 | 195 | 72 | 18 | 2 | 1 | 0 | 0 | - | 999 | 0.712 | 8 | 1 |
| **72** | 691 | 215 | 71 | 15 | 7 | 1 | 0 | 0 | - | 1000 | 0.691 | 8 | 0 |
| **…** | … | … | … | … | … | … | … | … | … | … | … | … | … |
| **98** | 710 | 211 | 53 | 18 | 6 | 1 | 0 | 0 | - | 999 | 0.711 | 8 | 1 |
| **99** | 709 | 212 | 55 | 16 | 4 | 2 | 2 | 0 | - | 1000 | 0.709 | 8 | 0 |
| **ID** |  |  |  |  |  |  |  |  |  | ***** | **#** |  |  |
| **100** | 684 | 220 | 76 | 11 | 7 | 1 | 1 | 0 | 0 | 1000 | 0.684 | 9 | 0 |
| **Mean** | 700.44 | 207.74 | 63.74 | 19.04 | 6.10 | 1.92 | 0.63 | 0.27 | 0.154 | 999.89 | 0.70 | 8.10 | 0.11 |

***; #**

| **Table B1.6 Summary for , *n* =1000, 500, 100, 50** | | | | | |
| --- | --- | --- | --- | --- | --- |
|  | **Mean and 95% Confidence interval** | | | | |
|  |  |  |  |  |  |
| **1000** | 999.89±0.06 | 0.70±0.003 | 8.10±0.08 | 0.11±0.06 | 0.00011±0.00006 |
| **500** | 499.95±0.04 | 0.70±0.004 | 8.08±0.10 | 0.05±0.04 | 0.00010±0.00009 |
| **100** | 99.99±0.02 | 0.70±0.009 | 8.11±0.21 | 0.01±0.02 | 0.00010±0.00020 |
| **50** | 49.97±0.03 | 0.70±0.012 | 8.24±0.30 | 0.03±0.03 | 0.00060±0.00067 |

**Table B1.7 Summary for , *n* =1000**

| **ID** |  |  |  |  |  |  |  |  |  | ***** | **#** |  |  |
| --- | --- | --- | --- | --- | --- | --- | --- | --- | --- | --- | --- | --- | --- |
| **1** | 701 | 218 | 63 | 9 | 8 | 0 | 1 | 0 | - | 1000 | 0.701 | 8 | 0 |
| **2** | 724 | 203 | 52 | 14 | 7 | 0 | 0 | 0 | - | 1000 | 0.724 | 8 | 0 |
| **3** | 676 | 226 | 68 | 21 | 6 | 1 | 1 | 1 | 0 | 1000 | 0.676 | 9 | 0 |
| **…** | … | … | … | … | … | … | … | … | … | … | … | … | … |
| **12** | 700 | 201 | 72 | 17 | 8 | 0 | 1 | 1 | - | 1000 | 0.700 | 8 | 0 |
| **13** | 700 | 207 | 66 | 21 | 5 | 0 | 0 | 0 | - | 999 | 0.701 | 8 | 1 |
| **14** | 697 | 225 | 56 | 14 | 5 | 3 | 0 | 0 | - | 1000 | 0.697 | 8 | 0 |
| **…** | … | … | … | … | … | … | … | … | … | … | … | … | … |
| **25** | 681 | 226 | 65 | 15 | 6 | 4 | 1 | 2 | 0 | 1000 | 0.681 | 9 | 0 |
| **26** | 702 | 208 | 64 | 19 | 4 | 1 | 1 | 0 | - | 999 | 0.703 | 8 | 1 |
| **27** | 719 | 195 | 57 | 21 | 4 | 2 | 1 | 0 | - | 999 | 0.720 | 8 | 1 |
| **28** | 721 | 201 | 52 | 14 | 10 | 2 | 0 | 0 | - | 1000 | 0.721 | 8 | 0 |
| **…** | … | … | … | … | … | … | … | … | … | … | … | … | … |
| **40** | 703 | 211 | 65 | 13 | 4 | 4 | 0 | 0 | - | 1000 | 0.703 | 8 | 0 |
| **41** | 713 | 194 | 62 | 19 | 7 | 2 | 0 | 2 | - | 999 | 0.714 | 8 | 1 |
| **42** | 696 | 203 | 68 | 28 | 1 | 1 | 2 | 0 | - | 999 | 0.697 | 8 | 1 |
| **43** | 691 | 218 | 69 | 16 | 5 | 1 | 0 | 0 | - | 1000 | 0.691 | 8 | 0 |
| **…** | … | … | … | … | … | … | … | … | … | … | … | … | … |
| **ID** |  |  |  |  |  |  |  |  |  | ***** | **#** |  |  |
| **57** | 709 | 207 | 62 | 15 | 4 | 3 | 0 | 0 | -- | 1000 | 0.709 | 8 | 0 |
| **58** | 735 | 174 | 66 | 13 | 7 | 2 | 2 | - | - | 999 | 0.736 | 7 | 1 |
| **59** | 702 | 210 | 56 | 22 | 8 | 2 | 0 | 0 | - | 1000 | 0.702 | 8 | 0 |
| **…** | … | … | … | … | … | … | … | … | … | … | … | … | … |
| **62** | 720 | 194 | 59 | 16 | 8 | 2 | 1 | 0 | - | 1000 | 0.72 | 8 | 0 |
| **63** | 700 | 218 | 64 | 14 | 2 | 1 | 0 | 0 | - | 999 | 0.701 | 8 | 1 |
| **64** | 671 | 222 | 77 | 22 | 7 | 1 | 0 | 0 | 0 | 1000 | 0.671 | 9 | 0 |
| **…** | … | … | … | … | … | … | … | … | … | … | … | … | … |
| **69** | 711 | 192 | 72 | 21 | 2 | 2 | 0 | 0 | - | 1000 | 0.711 | 8 | 0 |
| **70** | 705 | 214 | 55 | 17 | 7 | 1 | 0 | 0 | - | 999 | 0.706 | 8 | 1 |
| **71** | 702 | 214 | 54 | 18 | 7 | 2 | 2 | 0 | - | 999 | 0.703 | 8 | 1 |
| **72** | 702 | 217 | 57 | 16 | 5 | 1 | 1 | 0 | - | 999 | 0.703 | 8 | 1 |
| **73** | 695 | 207 | 69 | 19 | 7 | 2 | 1 | 0 | - | 1000 | 0.695 | 8 | 0 |
| **…** | … | … | … | … | … | … | … | … | … | … | … | … | … |
| **99** | 713 | 203 | 63 | 12 | 6 | 2 | 1 | 0 | - | 1000 | 0.713 | 8 | 0 |
| **100** | 674 | 232 | 70 | 17 | 2 | 4 | 1 | 0 | 0 | 1000 | 0.674 | 9 | 0 |
| **Mean** | 699.25 | 210.96 | 62.76 | 18.86 | 5.83 | 1.6 | 0.48 | 0.15 | 0.07 | 999.90 | 0.699 | 8.13 | 0.10 |

***; #**

| **Table B1.8 Summary for, *n* =1000, 500, 100, 50** | | | | | |
| --- | --- | --- | --- | --- | --- |
|  | **Mean and 95% Confidence interval** | | | | |
|  |  |  |  |  |  |
| **1000** | 999.90±0.06 | 0.70±0.003 | 8.13±0.07 | 0.10±0.06 | 0.00010±0.00006 |
| **500** | 499.99±0.02 | 0.70±0.005 | 8.11±0.11 | 0.01±0.02 | 0.00002±0.00004 |
| **100** | 99.98±0.03 | 0.70±0.009 | 8.19±0.23 | 0.02±0.03 | 0.00020±0.00028 |
| **50** | 50 | 0.70±0.013 | 8.22±0.30 | 0 | 0 |

**Table B1.9 Summary for , *n* =1000**

| **ID** |  |  |  |  |  |  |  |  |  | ***** | **#** |  |  |
| --- | --- | --- | --- | --- | --- | --- | --- | --- | --- | --- | --- | --- | --- |
| **1** | 701 | 215 | 64 | 12 | 7 | 1 | 0 | 0 | - | 1000 | 0.70 | 8 | 0 |
| **2** | 731 | 198 | 50 | 14 | 6 | 1 | 0 | 0 | - | 1000 | 0.73 | 8 | 0 |
| **3** | 678 | 219 | 73 | 21 | 6 | 1 | 1 | 0 | 1 | 1000 | 0.68 | 9 | 0 |
| **…** | … | … | … | … | … | … | … | … | … | … | … | … | … |
| **19** | 683 | 217 | 79 | 15 | 5 | 0 | 1 | 0 | 0 | 1000 | 0.68 | 9 | 0 |
| **20** | 676 | 225 | 66 | 19 | 8 | 3 | 2 | 0 | 0 | 999 | 0.68 | 9 | 1 |
| **21** | 684 | 220 | 68 | 17 | 9 | 2 | 0 | 0 | 0 | 1000 | 0.68 | 9 | 0 |
| **…** | … | … | … | … | … | … | … | … | … | … | … | … | … |
| **30** | 717 | 195 | 55 | 22 | 6 | 4 | 1 | 0 | - | 1000 | 0.72 | 8 | 0 |
| **31** | 696 | 208 | 68 | 20 | 4 | 2 | 0 | 1 | - | 999 | 0.70 | 8 | 1 |
| **32** | 703 | 204 | 60 | 19 | 6 | 6 | 1 | 1 | - | 1000 | 0.70 | 8 | 0 |
| **33** | 685 | 206 | 77 | 22 | 9 | 1 | 0 | 0 | - | 1000 | 0.69 | 8 | 0 |
| **34** | 704 | 208 | 62 | 14 | 8 | 3 | 0 | 0 | - | 999 | 0.70 | 8 | 1 |
| **35** | 679 | 216 | 71 | 22 | 8 | 3 | 1 | 0 | 0 | 1000 | 0.68 | 9 | 0 |
| **…** | … | … | … | … | … | … | … | … | … | … | … | … | … |
| **43** | 690 | 220 | 67 | 12 | 8 | 2 | 0 | 1 | - | 1000 | 0.69 | 8 | 0 |
| **44** | 705 | 203 | 73 | 13 | 4 | 1 | 0 | 0 | - | 999 | 0.71 | 8 | 1 |
| **45** | 687 | 218 | 70 | 19 | 5 | 1 | 0 | 0 | - | 1000 | 0.69 | 8 | 0 |
| **ID** |  |  |  |  |  |  |  |  |  | ***** | **#** |  |  |
| **…** | … | … | … | … | … | … | … | … | … | … | … | … | … |
| **67** | 719 | 202 | 56 | 17 | 5 | 0 | 0 | 1 | - | 1000 | 0.72 | 8 | 0 |
| **68** | 691 | 200 | 83 | 22 | 2 | 1 | 0 | 0 | - | 999 | 0.69 | 8 | 1 |
| **69** | 708 | 196 | 76 | 17 | 1 | 1 | 1 | 0 | - | 1000 | 0.71 | 8 | 0 |
| **…** | … | … | … | … | … | … | … | … | … | … | … | … | … |
| **98** | 682 | 226 | 72 | 14 | 3 | 2 | 0 | 1 | 0 | 1000 | 0.68 | 9 | 0 |
| **99** | 714 | 201 | 60 | 18 | 4 | 3 | 0 | 0 | - | 1000 | 0.71 | 8 | 0 |
| **100** | 669 | 233 | 71 | 17 | 7 | 2 | 0 | 1 | 0 | 1000 | 0.67 | 9 | 0 |
| **Mean** | 699.75 | 209.97 | 63.27 | 18.31 | 6.3 | 1.7 | 0.47 | 0.17 | 0.07 | 999.95 | 0.70 | 8.14 | 0.05 |

***; #**

| **Table B1.10 Summary for, *n* =1000, 500, 100, 50** | | | | | |
| --- | --- | --- | --- | --- | --- |
|  | **Mean and 95% Confidence interval** | | | | |
|  |  |  |  |  |  |
| **1000** | 999.95±0.04 | 0.70±0.003 | 8.14±0.07 | 0.05±0.04 | 0.00005±0.00004 |
| **500** | 499.97±0.03 | 0.70±0.005 | 8.13±0.12 | 0.03±0.03 | 0.00006±0.00007 |
| **100** | 100 | 0.70±0.010 | 8.22±0.24 | 0 | 0 |
| **50** | 49.99±0.02 | 0.70±0.013 | 8.28±0.31 | 0.01±0.02 | 0.00020±0.00039 |

**Table B2.1 Summary for , *n* =1000, 500, 100, 50**

|  | **Mean and 95% Confidence interval** | | | | |
| --- | --- | --- | --- | --- | --- |
|  |  |  |  |  |  |
| **1000** | 999.90±0.06 | 0.50±0.004 | 13.73±0.17 | 0.10±0.06 | 0.00010±0.00006 |
| **500** | 500 | 0.50±0.004 | 13.95±0.17 | 0 | 0 |
| **100** | 99.99±0.02 | 0.51±0.010 | 13.8±0.45 | 0.01±0.02 | 0.00010±0.00020 |
| **50** | 49.70±0.41 | 0.52±0.013 | 13.27±0.63 | 0.30±0.41 | 0.00600±0.00829 |

**Table B2.2 Summary for , *n* =1000, 500, 100, 50**

|  | **Mean and 95% Confidence interval** | | | | |
| --- | --- | --- | --- | --- | --- |
|  |  |  |  |  |  |
| **1000** | 999.94±0.05 | 0.60±0.003 | 10.63±0.11 | 0.06±0.05 | 0.00006±0.00005 |
| **500** | 499.96±0.04 | 0.60±0.005 | 10.62±0.14 | 0.04±0.04 | 0.00008±0.00008 |
| **100** | 100 | 0.61±0.010 | 10.47±0.29 | 0 | 0 |
| **50** | 49.99±0.02 | 0.60±0.014 | 10.82±0.44 | 0.01±0.02 | 0.00020±0.00039 |

**Table B2.3 Summary for , *n* =1000, 500, 100, 50**

|  | **Mean and 95% Confidence interval** | | | | |
| --- | --- | --- | --- | --- | --- |
|  |  |  |  |  |  |
| **1000** | 999.91±0.06 | 0.80±0.003 | 6.10±0.06 | 0.09±0.06 | 0.00009±0.00006 |
| **500** | 499.97±0.03 | 0.80±0.003 | 6.24±0.09 | 0.03±0.03 | 0.00006±0.00007 |
| **100** | 99.97±0.03 | 0.81±0.008 | 6.14±0.16 | 0.03±0.03 | 0.00030±0.00034 |
| **50** | 49.97±0.04 | 0.81±0.011 | 6.17±0.23 | 0.03±0.04 | 0.0006±0.00087 |

**Table B2.4 Summary for , *n* =1000, 500, 100, 50**

|  | **Mean and 95% Confidence interval** | | | | |
| --- | --- | --- | --- | --- | --- |
|  |  |  |  |  |  |
| **1000** | 999.91±0.07 | 0.90±0.002 | 4.55±0.10 | 0.09±0.07 | 0.00009±0.00007 |
| **500** | 500 | 0.90±0.003 | 4.52±0.10 | 0 | 0 |
| **100** | 100 | 0.90±0.006 | 4.51±0.12 | 0 | 0 |
| **50** | 50 | 0.90±0.009 | 4.46±0.18 | 0 | 0 |

| **Table B3.1 Summary for , *n* =1000, 500, 100, 50** | | | | | |
| --- | --- | --- | --- | --- | --- |
|  | **Mean and 95% Confidence interval** | | | | |
|  |  |  |  |  |  |
| **1000** | 999.97±0.03 | 0.50±0.003 | 13.90±0.14 | 0.03±0.03 | 0.00003±0.00003 |
| **500** | 499.94±0.05 | 0.50±0.004 | 13.81±0.19 | 0.06±0.05 | 0.00012±0.00009 |
| **100** | 99.98±0.03 | 0.49±0.009 | 14.28±0.39 | 0.02±0.03 | 0.00020±0.00028 |
| **50** | 49.20±0.61 | 0.50±0.014 | 13.42±0.83 | 0.80±0.61 | 0.01600±0.01218 |

| **Table B3.2 Summary for , *n* =1000, 500, 100, 50** | | | | | |
| --- | --- | --- | --- | --- | --- |
|  | **Mean and 95% Confidence interval** | | | | |
|  |  |  |  |  |  |
| **1000** | 999.88±0.06 | 0.60±0.003 | 10.60±0.11 | 0.12±0.06 | 0.00012±0.00006 |
| **500** | 499.98±0.03 | 0.60±0.005 | 10.64±0.15 | 0.02±0.03 | 0.00004±0.00006 |
| **100** | 99.99±0.02 | 0.60±0.009 | 10.87±0.27 | 0.01±0.02 | 0.00010±0.00020 |
| **50** | 49.92±0.10 | 0.61±0.015 | 10.54±0.46 | 0.08±0.10 | 0.00160±0.00206 |

| **Table B3.3 Summary for , *n* =1000, 500, 100, 50** | | | | | |
| --- | --- | --- | --- | --- | --- |
|  | **Mean and 95% Confidence interval** | | | | |
|  |  |  |  |  |  |
| **1000** | 999.94±0.05 | 0.80±0.002 | 6.09±0.06 | 0.06±0.05 | 0.00006±0.00005 |
| **500** | 499.98±0.03 | 0.80±0.003 | 6.23±0.09 | 0.02±0.03 | 0.00004±0.00006 |
| **100** | 100 | 0.80±0.008 | 6.36±0.16 | 0 | 0 |
| **50** | 50 | 0.80±0.011 | 6.23±0.21 | 0 | 0 |

| **Table B3.4 Summary for , *n* =1000, 500, 100, 50** | | | | | |
| --- | --- | --- | --- | --- | --- |
|  | **Mean and 95% Confidence interval** | | | | |
|  |  |  |  |  |  |
| **1000** | 999.97±0.03 | 0.90±0.002 | 4.54±0.10 | 0.03±0.03 | 0.00003±0.00003 |
| **500** | 499.99±0.02 | 0.90±0.002 | 4.52±0.10 | 0.01±0.02 | 0.00002±0.00004 |
| **100** | 100 | 0.89±0.006 | 4.70±0.12 | 0 | 0 |
| **50** | 49.99±0.02 | 0.90±0.008 | 4.48±0.16 | 0.01±0.02 | 0.00020±0.00039 |

| **Table B4.1 Summary for , *n* =1000, 500, 100, 50** | | | | | |
| --- | --- | --- | --- | --- | --- |
|  | **Mean and 95% Confidence interval** | | | | |
|  |  |  |  |  |  |
| **1000** | 999.89±0.06 | 0.50±0.004 | 13.73±0.16 | 0.11±0.06 | 0.00011±0.00006 |
| **500** | 499.96±0.04 | 0.50±0.004 | 13.73±0.18 | 0.04±0.04 | 0.00008±0.00008 |
| **100** | 99.99±0.02 | 0.50±0.009 | 13.97±0.41 | 0.01±0.02 | 0.00010±0.00020 |
| **50** | 49.71±0.37 | 0.50±0.013 | 14.18±0.69 | 0.29±0.37 | 0.00580±0.00746 |

| **Table B4.2 Summary for , *n* =1000, 500, 100, 50** | | | | | |
| --- | --- | --- | --- | --- | --- |
|  | **Mean and 95% Confidence interval** | | | | |
|  |  |  |  |  |  |
| **1000** | 999.92±0.05 | 0.60±0.003 | 10.62±0.11 | 0.08±0.05 | 0.00008±0.00005 |
| **500** | 499.99±0.02 | 0.60±0.005 | 10.56±0.15 | 0.01±0.02 | 0.00002±0.00004 |
| **100** | 99.97±0.03 | 0.60±0.009 | 10.75±0.28 | 0.03±0.03 | 0.00030±0.00034 |
| **50** | 49.95±0.10 | 0.61±0.014 | 10.54±0.45 | 0.05±0.10 | 0.00100±0.00196 |

| **Table B4.3 Summary for , *n* =1000, 500, 100, 50** | | | | | |
| --- | --- | --- | --- | --- | --- |
|  | **Mean and 95% Confidence interval** | | | | |
|  |  |  |  |  |  |
| **1000** | 999.90±0.06 | 0.70±0.003 | 8.14±0.08 | 0.10±0.06 | 0.00010±0.00006 |
| **500** | 499.95±0.04 | 0.70±0.004 | 8.08±0.11 | 0.05±0.04 | 0.00010±0.00009 |
| **100** | 99.98±0.03 | 0.70±0.009 | 8.14±0.21 | 0.02±0.03 | 0.00020±0.00028 |
| **50** | 50 | 0.72±0.014 | 7.82±0.31 | 0 | 0 |

| **Table B4.4 Summary for , *n* =1000, 500, 100, 50** | | | | | |
| --- | --- | --- | --- | --- | --- |
|  | **Mean and 95% Confidence interval** | | | | |
|  |  |  |  |  |  |
| **1000** | 999.88±0.07 | 0.80±0.002 | 6.08±0.05 | 0.12±0.07 | 0.00012±0.00007 |
| **500** | 499.96±0.04 | 0.80±0.004 | 6.25±0.09 | 0.04±0.04 | 0.00008±0.00008 |
| **100** | 99.99±0.02 | 0.80±0.007 | 6.27±0.15 | 0.01±0.02 | 0.00010±0.00020 |
| **50** | 49.99±0.02 | 0.80±0.012 | 6.31±0.23 | 0.01±0.02 | 0.00020±0.00039 |

| **Table B4.5 Summary for , *n* =1000, 500, 100, 50** | | | | | |
| --- | --- | --- | --- | --- | --- |
|  | **Mean and 95% Confidence interval** | | | | |
|  |  |  |  |  |  |
| **1000** | 999.89±0.07 | 0.90±0.002 | 4.50±0.10 | 0.11±0.07 | 0.00011±0.00007 |
| **500** | 499.98±0.03 | 0.90±0.003 | 4.51±0.10 | 0.02±0.03 | 0.00004±0.00006 |
| **100** | 99.99±0.02 | 0.90±0.006 | 4.60±0.12 | 0.01±0.02 | 0.00010±0.00020 |
| **50** | 50 | 0.90±0.007 | 4.45±0.15 | 0 | 0 |

| **Table B5.1 Summary for , *n* =1000, 500, 100, 50** | | | | | |
| --- | --- | --- | --- | --- | --- |
|  | **Mean and 95% Confidence interval** | | | | |
|  |  |  |  |  |  |
| **1000** | 999.87±0.07 | 0.50±0.003 | 13.75±0.15 | 0.13±0.07 | 0.00013±0.00007 |
| **500** | 499.95±0.05 | 0.50±0.005 | 13.78±0.21 | 0.05±0.05 | 0.00010±0.00010 |
| **100** | 99.97±0.03 | 0.50±0.009 | 13.94±0.38 | 0.03±0.03 | 0.00030±0.00034 |
| **50** | 49.68±0.41 | 0.51±0.014 | 13.61±0.69 | 0.32±0.41 | 0.00640±0.00830 |

| **Table B5.2 Summary for , *n* =1000, 500, 100, 50** | | | | | |
| --- | --- | --- | --- | --- | --- |
|  | **Mean and 95% Confidence interval** | | | | |
|  |  |  |  |  |  |
| **1000** | 999.90±0.06 | 0.60±0.003 | 10.63±0.11 | 0.10±0.06 | 0.00010±0.00006 |
| **500** | 499.96±0.04 | 0.60±0.005 | 10.58±0.15 | 0.04±0.04 | 0.00008±0.00008 |
| **100** | 99.98±0.03 | 0.60±0.008 | 10.76±0.26 | 0.02±0.03 | 0.00020±0.00028 |
| **50** | 49.92±0.10 | 0.60±0.013 | 10.56±0.44 | 0.08±0.10 | 0.00160±0.00206 |

| **Table B5.3 Summary for , *n* =1000, 500, 100, 50** | | | | | |
| --- | --- | --- | --- | --- | --- |
|  | **Mean and 95% Confidence interval** | | | | |
|  |  |  |  |  |  |
| **1000** | 999.95±0.04 | 0.80±0.003 | 6.11±0.06 | 0.05±0.04 | 0.00005±0.00004 |
| **500** | 499.93±0.06 | 0.80±0.004 | 6.18±0.09 | 0.07±0.06 | 0.00014±0.00012 |
| **100** | 99.99±0.02 | 0.80±0.008 | 6.20±0.16 | 0.01±0.02 | 0.00010±0.00020 |
| **50** | 49.97±0.03 | 0.80±0.010 | 6.22±0.20 | 0.03±0.03 | 0.00060±0.00067 |

| **Table B5.4 Summary for , *n* =1000, 500, 100, 50** | | | | | |
| --- | --- | --- | --- | --- | --- |
|  | **Mean and 95% Confidence interval** | | | | |
|  |  |  |  |  |  |
| **1000** | 999.84±0.08 | 0.90±0.002 | 4.50±0.10 | 0.16±0.08 | 0.00016±0.00008 |
| **500** | 499.90±0.07 | 0.90±0.002 | 4.46±0.10 | 0.10±0.07 | 0.00020±0.00013 |
| **100** | 100 | 0.89±0.006 | 4.59±0.12 | 0 | 0 |
| **50** | 50 | 0.90±0.007 | 4.48±0.16 | 0 | 0 |

| **Table B6.1 Summary for , *n* =1000, 500, 100, 50** | | | | | |
| --- | --- | --- | --- | --- | --- |
|  | **Mean and 95% Confidence interval** | | | | |
|  |  |  |  |  |  |
| **1000** | 999.94±0.05 | 0.50±0.003 | 13.85±0.14 | 0.06±0.05 | 0.00006±0.00005 |
| **500** | 499.95±0.04 | 0.50±0.004 | 13.91±0.19 | 0.05±0.04 | 0.00010±0.00009 |
| **100** | 99.99±0.02 | 0.50±0.009 | 13.94±0.41 | 0.01±0.02 | 0.00010±0.00020 |
| **50** | 49.90±0.18 | 0.49±0.013 | 14.32±0.66 | 0.10±0.18 | 0.00200±0.00355 |

| **Table B6.2 Summary for , *n* =1000, 500, 100, 50** | | | | | |
| --- | --- | --- | --- | --- | --- |
|  | **Mean and 95% Confidence interval** | | | | |
|  |  |  |  |  |  |
| **1000** | 999.87±0.07 | 0.60±0.004 | 10.50±0.11 | 0.13±0.07 | 0.00013±0.00007 |
| **500** | 499.95±0.04 | 0.60±0.005 | 10.58±0.14 | 0.05±0.04 | 0.00010±0.00009 |
| **100** | 99.98±0.03 | 0.60±0.009 | 10.65±0.28 | 0.02±0.03 | 0.00020±0.00028 |
| **50** | 49.93±0.12 | 0.61±0.014 | 10.45±0.47 | 0.07±0.12 | 0.00140±0.00238 |

| **Table B6.3 Summary for , *n* =1000, 500, 100, 50** | | | | | |
| --- | --- | --- | --- | --- | --- |
|  | **Mean and 95% Confidence interval** | | | | |
|  |  |  |  |  |  |
| **1000** | 999.94±0.05 | 0.80±0.002 | 6.15±0.07 | 0.06±0.05 | 0.00006±0.00005 |
| **500** | 499.97±0.03 | 0.80±0.004 | 6.21±0.08 | 0.03±0.03 | 0.00006±0.00007 |
| **100** | 100 | 0.80±0.008 | 6.35±0.17 | 0 | 0 |
| **50** | 49.96±0.06 | 0.80±0.013 | 6.15±0.27 | 0.04±0.06 | 0.00080±0.00124 |

| **Table B6.4 Summary for , *n* =1000, 500, 100, 50** | | | | | |
| --- | --- | --- | --- | --- | --- |
|  | **Mean and 95% Confidence interval** | | | | |
|  |  |  |  |  |  |
| **1000** | 999.97±0.03 | 0.90±0.002 | 4.49±0.10 | 0.03±0.03 | 0.00003±0.00003 |
| **500** | 499.95±0.04 | 0.90±0.003 | 4.48±0.10 | 0.05±0.04 | 0.00010±0.00009 |
| **100** | 99.98±0.03 | 0.90±0.006 | 4.56±0.13 | 0.02±0.03 | 0.00020±0.00028 |
| **50** | 49.97±0.03 | 0.90±0.009 | 4.51±0.19 | 0.03±0.03 | 0.00060±0.00067 |

| **Table B7.1 Summary for , *n* =1000, 500, 100, 50** | | | | | |
| --- | --- | --- | --- | --- | --- |
|  | **Mean and 95% Confidence interval** | | | | |
|  |  |  |  |  |  |
| **1000** | 999.94±0.05 | 0.50±0.003 | 13.85±0.16 | 0.06±0.05 | 0.00006±0.00005 |
| **500** | 499.98±0.03 | 0.50±0.004 | 13.78±0.19 | 0.02±0.03 | 0.00004±0.00006 |
| **100** | 100 | 0.50±0.010 | 13.88±0.43 | 0 | 0 |
| **50** | 49.66±0.37 | 0.50±0.014 | 14.01±0.72 | 0.34±0.37 | 0.00680±0.00740 |

| **Table B7.2 Summary for , *n* =1000, 500, 100, 50** | | | | | |
| --- | --- | --- | --- | --- | --- |
|  | **Mean and 95% Confidence interval** | | | | |
|  |  |  |  |  |  |
| **1000** | 999.92±0.05 | 0.60±0.003 | 10.56±0.12 | 0.08±0.05 | 0.00008±0.00005 |
| **500** | 499.96±0.04 | 0.60±0.005 | 10.57±0.15 | 0.04±0.04 | 0.00008±0.00008 |
| **100** | 99.99±0.02 | 0.60±0.010 | 10.60±0.30 | 0.01±0.02 | 0.00010±0.00020 |
| **50** | 50 | 0.61±0.015 | 10.62±0.47 | 0 | 0 |

| **Table B7.3 Summary for , *n* =1000, 500, 100, 50** | | | | | |
| --- | --- | --- | --- | --- | --- |
|  | **Mean and 95% Confidence interval** | | | | |
|  |  |  |  |  |  |
| **1000** | 999.96±0.05 | 0.70±0.003 | 8.13±0.07 | 0.04±0.05 | 0.00004±0.00005 |
| **500** | 499.95±0.04 | 0.70±0.005 | 8.14±0.11 | 0.05±0.04 | 0.00010±0.00009 |
| **100** | 99.99±0.02 | 0.70±0.009 | 8.16±0.22 | 0.01±0.02 | 0.00010±0.00020 |
| **50** | 49.99±0.02 | 0.70±0.014 | 8.23±0.32 | 0.01±0.02 | 0.00020±0.00039 |

| **Table B7.4 Summary for , *n* =1000, 500, 100, 50** | | | | | |
| --- | --- | --- | --- | --- | --- |
|  | **Mean and 95% Confidence interval** | | | | |
|  |  |  |  |  |  |
| **1000** | 999.97±0.03 | 0.80±0.002 | 6.15±0.07 | 0.03±0.03 | 0.00003±0.00003 |
| **500** | 499.98±0.03 | 0.80±0.004 | 6.22±0.08 | 0.02±0.03 | 0.00004±0.00006 |
| **100** | 100 | 0.80±0.008 | 6.32±0.15 | 0 | 0 |
| **50** | 49.98±0.03 | 0.80±0.012 | 6.21±0.23 | 0.02±0.03 | 0.00040±0.00055 |

| **Table B7.5 Summary for , *n* =1000, 500, 100, 50** | | | | | |
| --- | --- | --- | --- | --- | --- |
|  | **Mean and 95% Confidence interval** | | | | |
|  |  |  |  |  |  |
| **1000** | 999.96±0.04 | 0.90±0.002 | 4.49±0.10 | 0.04±0.04 | 0.00004±0.00004 |
| **500** | 499.99±0.02 | 0.90±0.003 | 4.50±0.10 | 0.01±0.02 | 0.00002±0.00004 |
| **100** | 100 | 0.90±0.006 | 4.54±0.13 | 0 | 0 |
| **50** | 49.99±0.02 | 0.90±0.009 | 4.49±0.18 | 0.01±0.02 | 0.00020±0.00039 |

| **Table B8.1 Summary for , *n* =1000, 500, 100, 50** | | | | | |
| --- | --- | --- | --- | --- | --- |
|  | **Mean and 95% Confidence interval** | | | | |
|  |  |  |  |  |  |
| **1000** | 999.87±0.09 | 0.50±0.003 | 13.83±0.13 | 0.13±0.09 | 0.00013±0.00009 |
| **500** | 499.98±0.03 | 0.50±0.004 | 13.89±0.19 | 0.02±0.03 | 0.00004±0.00006 |
| **100** | 99.97±0.03 | 0.51±0.010 | 13.72±0.40 | 0.03±0.03 | 0.00030±0.00034 |
| **50** | 49.99±0.02 | 0.50±0.014 | 14.31±0.60 | 0.01±0.02 | 0.00020±0.00039 |

| **Table B8.2 Summary for , *n* =1000, 500, 100, 50** | | | | | |
| --- | --- | --- | --- | --- | --- |
|  | **Mean and 95% Confidence interval** | | | | |
|  |  |  |  |  |  |
| **1000** | 999.94±0.05 | 0.60±0.004 | 10.54±0.11 | 0.06±0.05 | 0.00006±0.00005 |
| **500** | 499.95±0.04 | 0.60±0.005 | 10.49±0.15 | 0.05±0.04 | 0.00010±0.00009 |
| **100** | 100 | 0.60±0.009 | 10.65±0.30 | 0 | 0 |
| **50** | 49.92±0.12 | 0.61±0.014 | 10.4±0.47 | 0.08±0.12 | 0.00160±0.00241 |

| **Table B8.3 Summary for, *n* =1000, 500, 100, 50** | | | | | |
| --- | --- | --- | --- | --- | --- |
|  | **Mean and 95% Confidence interval** | | | | |
|  |  |  |  |  |  |
| **1000** | 999.95±0.04 | 0.80±0.002 | 6.11±0.06 | 0.05±0.04 | 0.00005±0.00004 |
| **500** | 499.97±0.03 | 0.80±0.004 | 6.22±0.09 | 0.03±0.03 | 0.00006±0.00007 |
| **100** | 99.98±0.03 | 0.80±0.008 | 6.33±0.16 | 0.02±0.03 | 0.00020±0.00028 |
| **50** | 49.98±0.03 | 0.80±0.012 | 6.10±0.23 | 0.02±0.03 | 0.00040±0.00055 |

| **Table B8.4 Summary for , *n* =1000, 500, 100, 50** | | | | | |
| --- | --- | --- | --- | --- | --- |
|  | **Mean and 95% Confidence interval** | | | | |
|  |  |  |  |  |  |
| **1000** | 999.92±0.05 | 0.90±0.002 | 4.51±0.10 | 0.08±0.05 | 0.00008±0.00005 |
| **500** | 499.97±0.03 | 0.90±0.003 | 4.45±0.10 | 0.03±0.03 | 0.00006±0.00007 |

| **100** | 100 | 0.90±0.006 | 4.53±0.12 | 0 | 0 |
| --- | --- | --- | --- | --- | --- |
| **50** | 49.97±0.03 | 0.90±0.009 | 4.46±0.18 | 0.03±0.03 | 0.00060±0.00067 |
